# Supplementary material for: TRPV1 Channels Are New Players in the Reticulum–Mitochondria Ca2+ Coupling in a Rat Cardiomyoblast Cell Line
Source: MDPI journal article supplement (doi:10.3390/cells12182322), 2023-09-20
Supplement: s1 [file s1]

## Supplementary materials

### 1. Supplementary methods

#### 1.1 HEK293-T Cell culture

HEK293-T (ATCC, CRL-3216) were cultured in Dulbecco's Modified Eagle Medium (Gibco) supplemented with 10% fetal calf serum (PAN-biotech), 100  $\mu$ M nonessential amino acids (Gibco), 100 U/mL penicillin (Gibco), 100  $\mu$ g/mL streptomycin (Gibco), 2 mM L-glutamine (Gibco), 1 mM sodium pyruvate (Gibco). Cells were grown at 37°C in a humidified atmosphere containing 5% CO<sub>2</sub>. Cells were subcultured once reaching 80 % confluence.

#### 1.2 TRPV1 overexpression in HEK293-T or SV40-transformed H9C2 cells

*In vitro* functional studies of *TRPV1* were performed with a plasmid containing the human *TRPV1* sequence in fusion with the mCherry tag that has already been described [1]. Transfection was performed as described in the “Materials and Methods” section 2.4.

#### 1.3 Mitochondrial Ca<sup>2+</sup> measurements

SV40-transformed H9c2 cell transfection was performed as described in the “Materials and Methods” section 2.4. with a transfection mix containing 2  $\mu$ g of DNA plasmid for mitochondrial Ca<sup>2+</sup> genetic probe (4mtD3cpv). Images (1024x1024 pixels) were taken at 5-second time intervals.

## 2. Supplementary figures

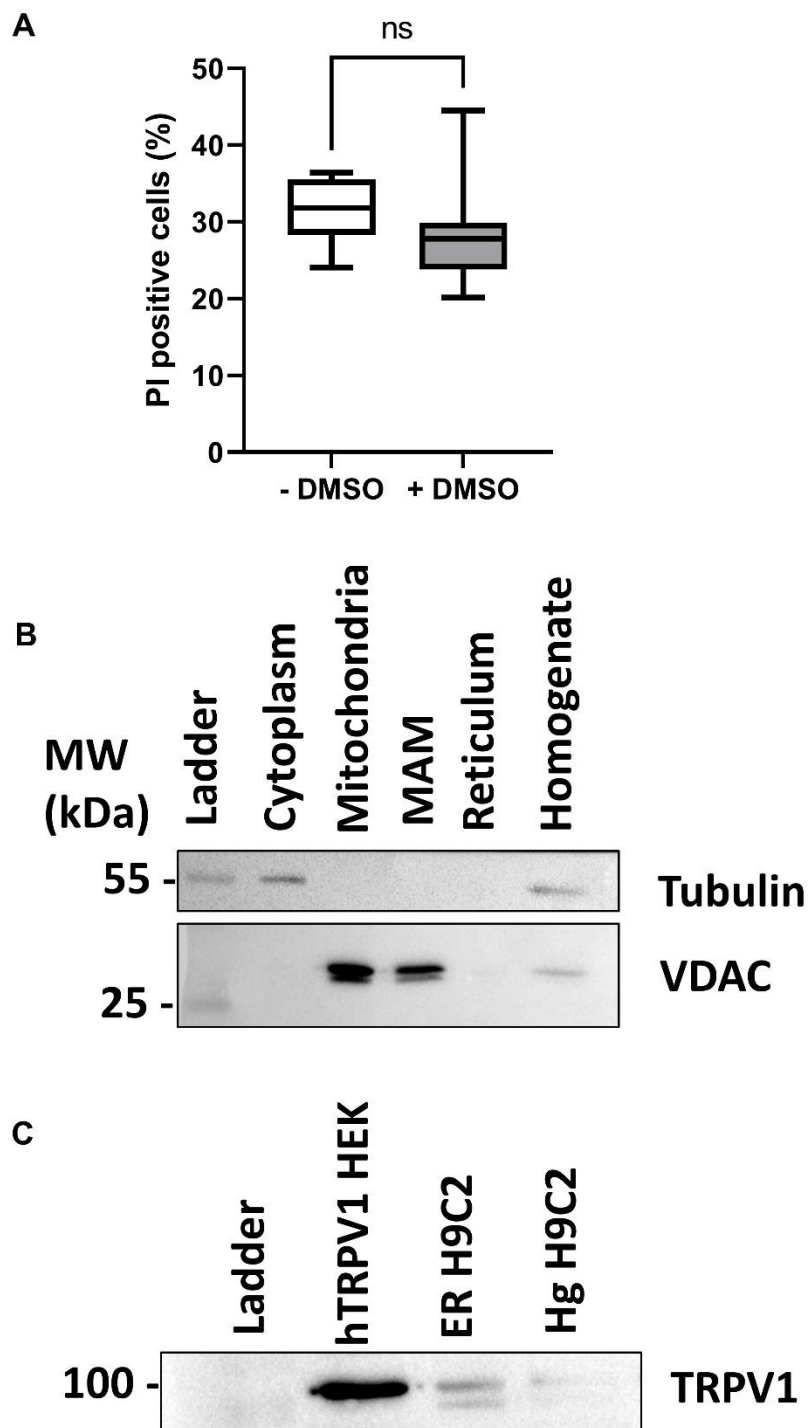

**Figure S1. Controls for flow cytometry and Western blotting.** (A) Dot plot showing mortality of SV40-transformed H9c2 cells subjected to H/R with or without DMSO. (B) Immunoblot analysis of tubulin and VDAC on subcellular fractions from SV40-transformed H9c2 cells. (C) Immunoblots of TRPV1 on fractions from HEK h-TRPV1-overexpressing cells or on reticular (ER) and homogenate (Hg) fractions from SV40-transformed H9c2 cells.

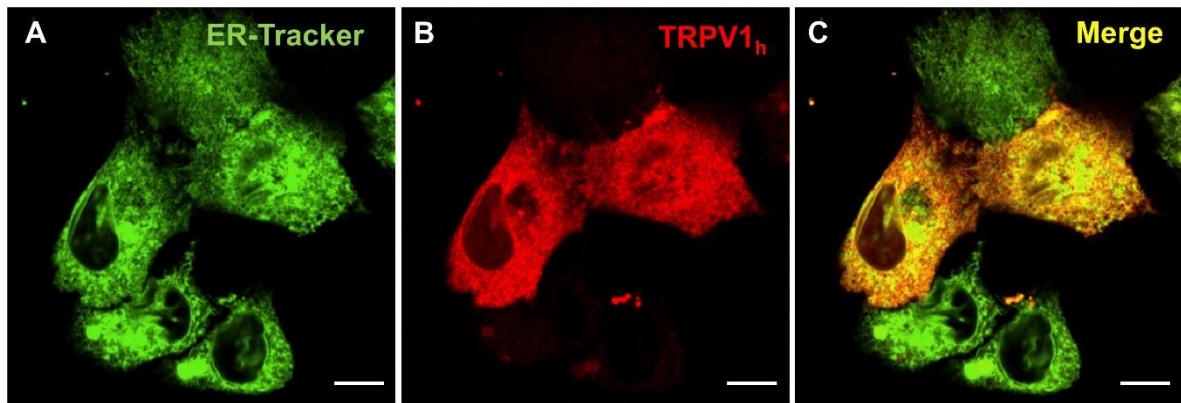

**Figure S2. m-cherryTRPV1 overexpression in SV40-transformed H9c2 cells.** (A-C) Confocal images of ER-Tracker Green (A; green signal) and human mcherry-TRPV1 (B; red signal). Both color channels were merged to demonstrate co-distribution (C; yellow signal) of both immunofluorescence signals. Scale bar = 10  $\mu$ m.

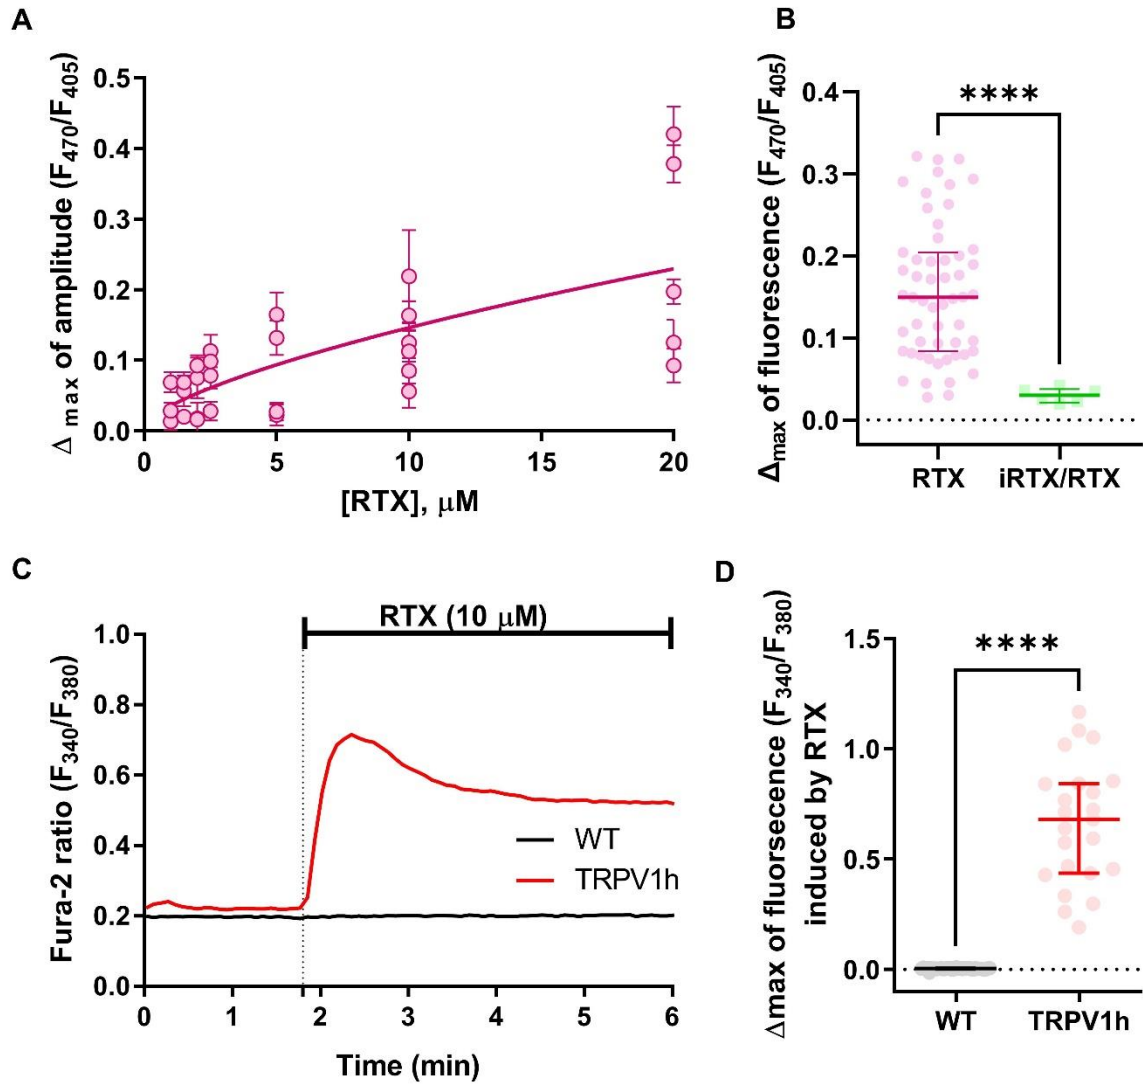

**Figure S3. Reticular  $\text{Ca}^{2+}$  dose-response to RTX in SV40-transformed H9c2 cells and cytoplasmic  $\text{Ca}^{2+}$  concentration in TRPV1-expressing HEK cells. (A)** The dose-response curve for reticular  $\text{Ca}^{2+}$  release induced by resiniferatoxin (RTX), TRPV1 agonist. Each point represents the mean  $\pm$  SD of 1 independent experiment ( $n = 4\text{--}27$  cells analyzed / day of experiments;  $N = 4\text{--}6$  independent experiments). Curves were generated as sigmoidal response curves with GraphPad Prism. **(B)** Scatter plots representing reticular  $\text{Ca}^{2+}$  content assessed by RTX (10  $\mu\text{M}$ ; pink) or iRTX before RTX (10  $\mu\text{M}$ ; green) stimulation ( $n = 6\text{--}55$ ;  $N = 2$  independent experiments). **(C)** Time traces showing cytosolic  $\text{Ca}^{2+}$  concentration assessed by fura2-AM (acetoxymethyl ester) cytosolic probe in WT (black line) and TRPV1h-positive (red line) cells under RTX stimulation (10  $\mu\text{M}$ ). **(D)** Dot blots representing total cell  $\text{Ca}^{2+}$  content assessed by 10  $\mu\text{M}$  of RTX stimulation experiment ( $n = 23\text{--}36$ ;  $N = 2$  independent experiments). Data are presented as median  $\pm$  interquartile range. Mann-Whitney test; \*\*\*\*  $p < 0.0001$ .

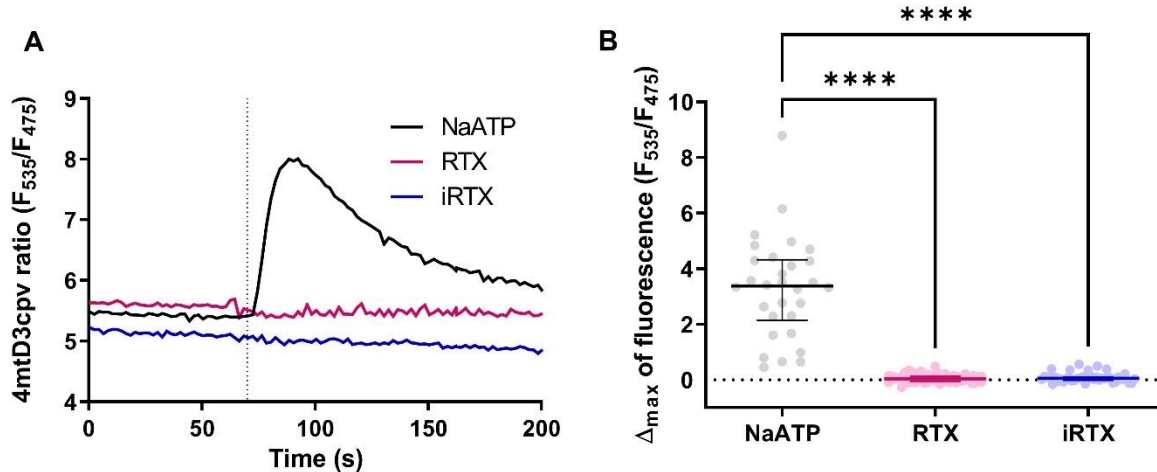

**Figure S4. Mitochondrial  $\text{Ca}^{2+}$  concentration ( $[\text{Ca}^{2+}]_m$ ) using the 4mtD3cpv ratiometric probe. (A)** Time traces showing  $[\text{Ca}^{2+}]_m$  measured with 4mtD3cpv probe during NaATP (100  $\mu\text{M}$ ; black line), RTX (10  $\mu\text{M}$ ; pink line), or iRTX (10  $\mu\text{M}$ ; blue line) stimulation. **(B)** Scatter plots representing mitochondrial  $\text{Ca}^{2+}$  content assessed by NaATP (100  $\mu\text{M}$ ; black;  $n=30$ ), RTX (10  $\mu\text{M}$ ; pink;  $n=55$ ), or iRTX (10  $\mu\text{M}$ ; blue;  $n=42$ ) stimulation. All experiments were performed on at least three independent days. Data are presented as median  $\pm$  interquartile range. Statistics: \*\*\*\*  $p < 0.0001$ .

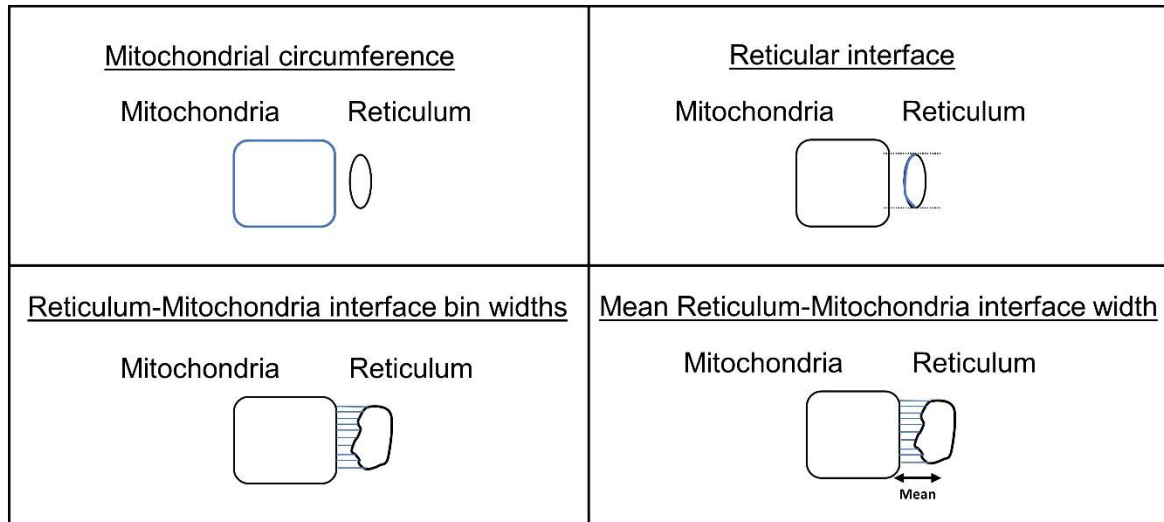

**Figure S5. Schematics of the different parameters measured on EM images (represented in blue) and presented in Figures 4E-4J.**

|                   | Pearson's correlation | Mander's overlap | Mander's overlap coefficients k1 | Mander's overlap coefficients k2 | Colocalization coefficients c1 | Colocalization coefficients c2 |
|-------------------|-----------------------|------------------|----------------------------------|----------------------------------|--------------------------------|--------------------------------|
| TRPV1-IP3R3       | 0,932                 | 0,941            | 0,755                            | 1,257                            | 0,973                          | 1                              |
| TRPV1-GRP75       | 0,819                 | 0,835            | 1,081                            | 0,750                            | 0,989                          | 0,884                          |
| TRPV1h-ER-Tracker | 0,910                 | 0,937            | 1,123                            | 0,801                            | 1                              | 0,981                          |

**Table S1. Degree of colocalization between TRPV1 and other specific markers (IP3R3, GRP75, ER-Tracker).** The different coefficients were obtained from at least 3 independent slices using NIS-Elements software.

|                       | Ctrl               | RTX                |                     |                  | iRTX                |                     |                 |
|-----------------------|--------------------|--------------------|---------------------|------------------|---------------------|---------------------|-----------------|
|                       |                    | PreC               | PerC                | PostC            | PreC                | PerC                | PostC           |
| PI-positive cells (%) | 1.68<br>[1.6-1.77] | 0.98<br>[0.8-1.13] | 1.09<br>[0.83-1.33] | 1.48<br>[0.97-2] | 1.28<br>[0.73-1.83] | 1.30<br>[0.77-1.83] | 1.26 [0.63-1.9] |

**Table S2. Percentage of SV40-transformed H9c2 dead cells in normoxic conditions.** Data are presented as median [25%; 75%]. Friedman test for paired samples was performed.

### 3. References

1. Vanden Abeele, F.; Lotteau, S.; Ducreux, S.; Dubois, C.; Monnier, N.; Hanna, A.; Gkika, D.; Romestaing, C.; Noyer, L.; Flourakis, M.; et al. TRPV1 Variants Impair Intracellular Ca<sup>2+</sup> Signaling and May Confer Susceptibility to Malignant Hyperthermia. *Genet. Med.* **2019**, *21*, 441–450, doi:10.1038/s41436-018-0066-9.
